# Supplementary material
Source: publisher figshare collection journal article supplement (https://frontiersin.figshare.com/ndownloader/files/35126845)
Supplement: Supplementary file [file 35126845]

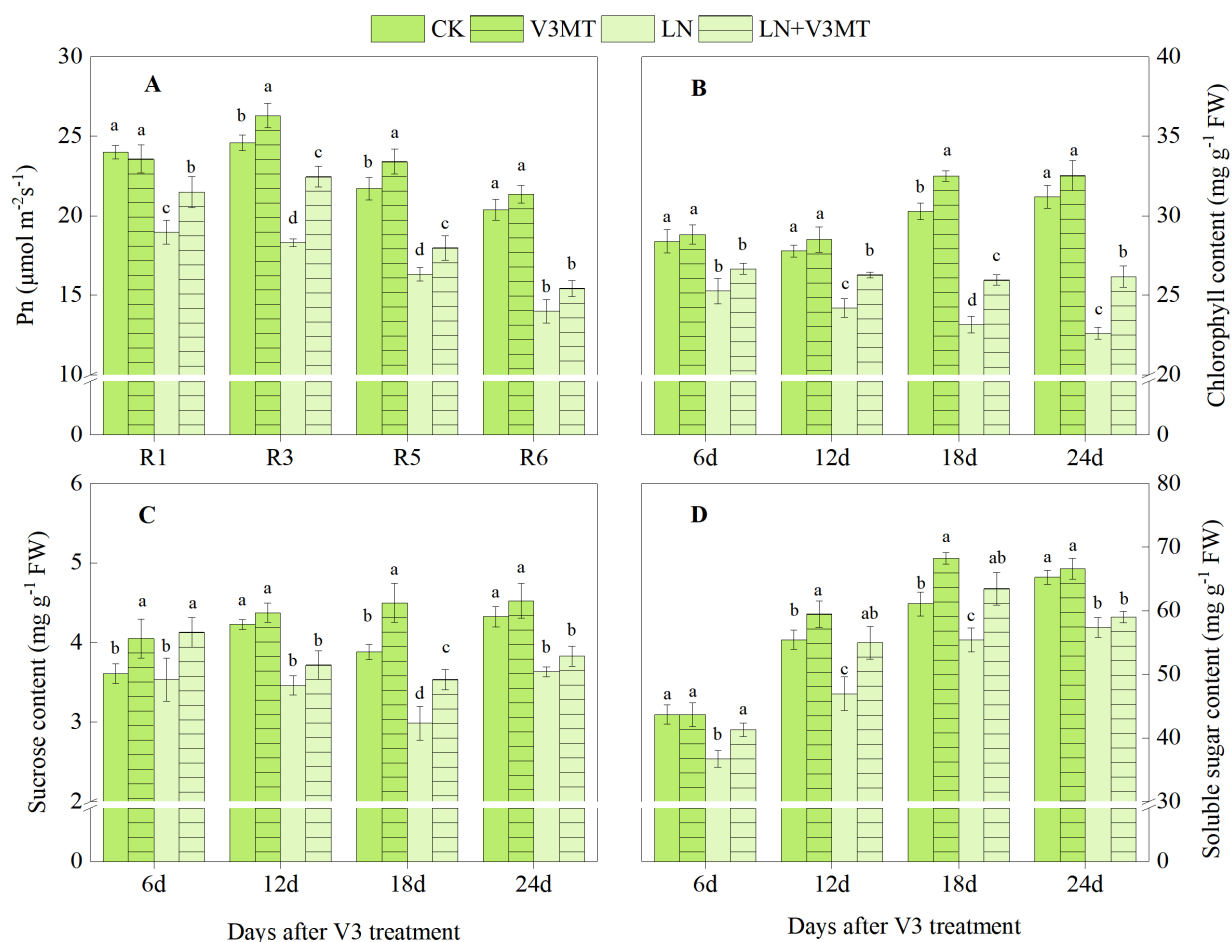

**Supplementary Figure 1.** Effects of spraying melatonin at V3 stage on net photosynthetic rate (Pn, **A**), chlorophyll content (**B**), sucrose content (**C**) and soluble sugar content (**D**). The abbreviated meaning of each treatment is the same as in Fig 1. The values were presented as mean  $\pm$  SE (n=3). Different letters in one measuring group indicate statistically significant differences when  $P \leq 0.05$ .
